# Supplementary material for: Large scale SnSe pyramid structure grown by gradient vapor deposition method
Source: Royal Society of Chemistry journal article supplement (doi:10.1039/c7ce02065a), 2018-01-01
Supplement: c7ce02065a1.pdf [file c7ce02065a1.pdf]

## Supporting Information to “Large scale SnSe Pyramid Structure Grown by Gradient Vapor Deposition Method”

Jinyang Liu<sup>a,b,c,d\*</sup>, Yuhan Zhou<sup>a</sup>, Yichun Liang<sup>a</sup>, Zhigao Huang<sup>a,b,c,d</sup>, Fachun Lai<sup>a,b,c,d</sup>, Limei Lin<sup>a,b,c,d</sup>, Weifeng Zheng<sup>a</sup>

<sup>a</sup>*College of Physics and Energy, Fujian Normal University, Fuzhou, 350117, P. R. China*

<sup>b</sup>*Fujian Provincial Key Laboratory of Quantum Manipulation and New Energy Materials, Fuzhou 350117, P. R. China*

<sup>c</sup>*Fujian Provincial Collaborative Innovation Center for Optoelectronic Semiconductors and Efficient Devices, Xiamen, 361005, P. R. China*

<sup>d</sup>*Fujian Provincial Engineering Technology Research Center of Solar Energy Conversion and Energy Storage, Fuzhou, 350117, China.*

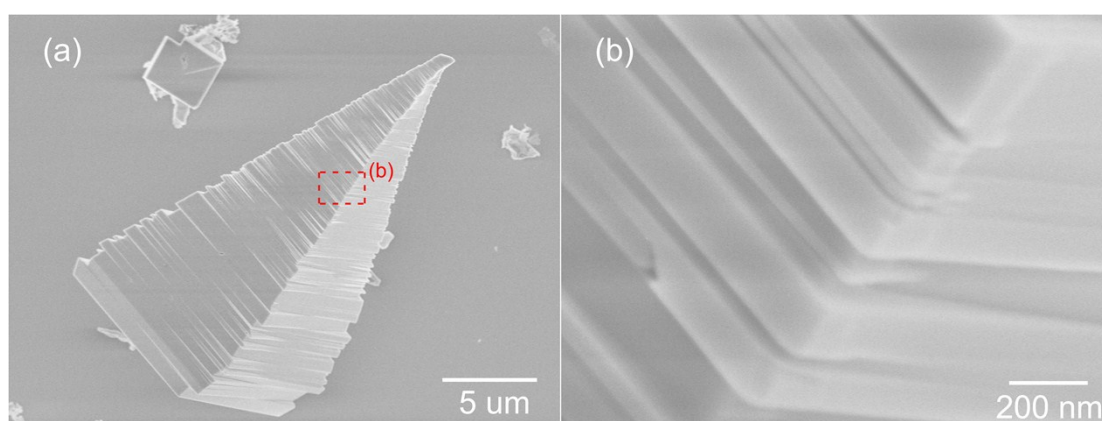

Fig.S1 (a) and (b) the low and high resolution SEM image of the SnSe pyramid structure.
